# Supplementary material for: Aphid Resistance Segregates Independently of Cardenolide and Glucosinolate Content in an Erysimum cheiranthoides (Wormseed Wallflower) F2 Population
Source: Plants (Basel). 2024 Feb 6;13(4):466. doi: 10.3390/plants13040466 (PMC10893121; doi:10.3390/plants13040466)
Supplement: Supplementary file 1 [file plants-13-00466-s001.zip › Erysimum-aphid Supplemental Tables.xlsx]

## Sheet: Table S1
Table S1. Aliphatic glucosinolate coexpression cluster from an F2 population MR10 network
gene_id	name	function	annotation	At_top_BLAST_hit	At_annotation
Erche02g042840	AKN2		Adenylyl-sulfate kinase, P-loop containing nucleoside triphosphate hydrolase	AT4G39940.1	AF-O49196-F1.A
Erche05g027610	APS1	sulfate metabolism	ATP-sulfurylase PUA-like domain, Sulphate adenylyltransferase, Sulphate adenylyltransferase catalytic domain, PUA-like superfamily, Rossmann-like alpha/beta/alpha sandwich fold	AT3G22890.1	Sulphate_adenylyltransferase
Erche03g035820	BAT5	glucosinolate biosynthesis	Sodium/solute symporter superfamily, Bile acid:sodium symporter/arsenical resistance protein Acr3	AT4G12030.2	AF-F4JPW1-F1.A
Erche05g022530	BCAT4	glucosinolate biosynthesis	Aminotransferase-like, PLP-dependent enzymes, Branched-chain amino acid aminotransferase II, Aminotransferase class IV, Branched-chain aminotransferase	AT3G19710.1	AF-Q9LE06-F1.A
Erche07g002140	CB5-C		Cytochrome b5-like heme/steroid binding domain, Cytochrome b5-like heme/steroid binding domain superfamily, "Cytochrome b5, heme-binding site"	AT2G46650.1	Cytochrome_b5-like_heme/steroid
Erche01g017900	CYP79F1	glucosinolate biosynthesis	Cytochrome P450, conserved site, Cytochrome P450 superfamily, "Cytochrome P450, E-class, group I", Cytochrome P450	AT1G16410.1	PTHR24298:SF684
Erche02g015050	CYP83A1	glucosinolate biosynthesis	Cytochrome P450, "Cytochrome P450, E-class, group I", Cytochrome P450 superfamily, "Cytochrome P450, conserved site"	AT4G13770.1	Cytochrome_P450
Erche03g023360	MAM	glucosinolate biosynthesis	Aldolase-type TIM barrel, "Alpha-isopropylmalate/homocitrate synthase, conserved site", Pyruvate carboxyltransferase	AT5G23010.2	Alpha-isopropylmalate/homocitrate_synthase,_conserved
Erche01g015550	SOT18	glucosinolate biosynthesis	Sulfotransferase domain, P-loop containing nucleoside triphosphate hydrolase	AT1G18590.1	Sulfotransferase_domain
Erche01g025290	UGT74B1	glucosinolate biosynthesis	UDP-glucuronosyl/UDP-glucosyltransferase, "UDP-glycosyltransferase family, conserved site"	AT1G24100.1	UDP-glycosyltransferase_family,_conserved
Erche04g030220	QUA2	homogalacturonan biosynthetic process	putative methyltransferase with and essential role in cell adhesion, anthocyanin accumulation, and coordinated plant development	AT1G78240.1	Putative_S-adenosyl-L-methionine-dependent_methyltransferase
Erche07g018040	GBLU33	carbohydrate metabolic process; glucosinolate catabolic process	beta glucosidase	AT2G32860.2	AF-O48779-F1.A
Erche06g008220	MYB28	regulation of glucosinolate metabolism	MYB transcription factor; positive regulation of aliphatic glucosinolate biosynthesis	AT5G61420.2	PTHR10641:SF1059
Erche02g025140	PRXR1	response to stress	peroxidase superfamily protein	AT4G21960.1	1.10.420.10
Erche03g010900	SULTR2;1	sulfate transport	low-affinity sulfate transporter	AT5G10180.1	SLC26A/SulP_transporter
Erche06g002540	AHL	sulfate assimilation	It is proposed that AHL acts in concert with sulphotransferases to prevent both the toxicity of PAP on RNA processing enzymes as well as the product inhibition of PAP on sulphate conjugation.	AT5G54390.1	PTHR43200:SF21

## Sheet: Table S2
Table S2. Raw data for Figure 1. Aphid performance on two Erysimum cheiranthoides accessions.
Figures 1A,B. Aphid survival and reproduction assay												Figure 1C. Aphid choice assay
Elbtalaue plant #	#adults	#progeny		Konstanz plant #	#adults	#progeny		F2 plant #	#adults	#progeny		Petri dish #	Konstanz	Elbtalaue	%Konstanz	%Elbtalaue
1	2	1		1	2	5		1	0	8		1	29	13	69.0476	30.9524
2	0	1		2	3	5		2	0	0		2	46	9	83.6364	16.3636
3	0	0		3	2	2		3	0	0		3	17	12	58.6207	41.3793
4	3	2		4	3	31		4	0	3		4	25	7	78.125	21.875
5	2	5		5	3	19		5	1	1		5	30	7	81.0811	18.9189
6	1	1		6	3	15		6	0	0		6	33	9	78.5714	21.4286
7	3	7		7	3	5		7	4	6		7	50	8	86.2069	13.7931
8	3	0		8	3	10		8	0	1		8	14	17	45.1613	54.8387
9	3	5		9	3	20		9	3	0		9	13	10	56.5217	43.4783
10	1	2		10	3	15		10	3	5		10	10	8	55.5556	44.4444
11	3	6		11	3	11		11	1	2		11	47	25	65.2778	34.7222
12	1	0		12	3	15		12	3	0		12	34	24	58.6207	41.3793
13	3	4		13	3	16		13	0	0		13	39	41	48.75	51.25
14	3	0		14	3	5		14	4	2		14	61	21	74.3902	25.6098
15	2	5		15	3	19		15	0	3		15	45	8	84.9057	15.0943
16	3	8		16	3	26		16	4	6		16	25	6	80.6452	19.3548
17	1	4		17	3	24		17	1	0		17	52	26	66.6667	33.3333
18	0	0		18	3	22		18	0	1		18	64	22	74.4186	25.5814
19	3	6		19	3	23		19	3	4		19	29	12	70.7317	29.2683
20	3	8		20	3	19		20	1	2		20	59	16	78.6667	21.3333
21	3	8		21	2	20		21	3	2		21	19	6	76	24
22	3	10		22	2	19		22	3	9		22	19	15	55.8824	44.1176
23	3	10		23	1	12		23	3	0		23	28	15	65.1163	34.8837
24	0	7		24	3	33		24	3	10		24	47	16	74.6032	25.3968
25	0	2		25	3	18		25	2	5		25	14	13	51.8519	48.1481
26	2	3		26	3	27		26	3	1		26	15	31	32.6087	67.3913
27	2	4		27	3	19		27	1	0		27	80	30	72.7273	27.2727
28	2	6		28	3	13		28	2	1		28	23	19	54.7619	45.2381
29	3	8		29	3	11		29	3	4		29	40	9	81.6327	18.3673
30	3	7		30	3	12		30	1	0		30	72	14	83.7209	16.2791
31	0	0		31	3	22		31	0	2
32	3	7		32	3	18		32	1	0
33	3	9						33	3	0
34	3	2						34	0	2
35	0	0						35	0	0
36	3	9						36	0	1
37	3	5						37	3	5
38	3	10						38	3	14
39	3	4						39	0	0
40	0	0						40	0	0
41	3	0						41	1	0
42	3	3						42	3	1
43	2	0						43	0	2
44	0	0						44	0	1
45	2	0						45	2	1
46	3	8						46	3	1
47	3	9						47	2	0
48	3	8						48	2	3
49	3	5						49	0	2
50	0	0						50	0	3
51	3	12						51	1	7
52	3	10						52	3	8
53	0	0						53	3	18
54	3	2						54	3	13
55	0	0						55	3	2
56	3	5						56	3	4
								57	1	0
								58	3	8
								59	2	5
								60	3	4
								61	3	2
								62	1	1
								63	3	10
								64	3	3
								65	1	1
								66	3	17
								67	3	13
								68	0	3
								69	0	0
								70	3	10
								71	3	11
								72	1	2
								73	2	9
								74	3	10
								75	3	22
								76	3	6
								77	3	18
								78	3	9
								79	3	8
								80	2	6
								81	3	16
								82	2	8
								83	3	19
								84	1	0
								85	1	0
								86	0	0
								87	2	0
								88	2	9
								89	3	13
								90	3	7
								91	2	4
								92	3	8
								93	3	17
								94	3	16
								95	0	0
								96	0	0
								97	0	0
								98	0	0
								99	1	2
								100	0	0
								101	2	3
								102	2	8
								103	3	0
								104	3	0
								105	2	0
								106	3	11
								107	3	5
								108	0	0
								109	0	0
								110	2	12
								111	5	17
								112	3	18
								113	0	0
								114	0	0
								115	0	0
								116	3	5
								117	3	6
								118	3	14
								119	3	10
								120	3	14
								121	3	22
								122	3	9
								123	3	13
								124	3	15
								125	3	20
								126	3	8
								127	3	17
								128	3	2
								129	3	21
								130	2	2
								131	0	0
								132	2	11
								133	0	0
								134	3	10
								135	3	8
								136	3	6
								137	0	0
								138	2	0
								139	3	15
								140	3	16
								141	3	14
								142	0	0
								143	2	10
								144	3	17
								145	5	24
								146	3	17
								147	0	0
								148	3	14
								149	1	7
								150	3	20
								151	3	14
								152	0	0
								153	1	4
								154	3	19
								155	3	18

## Sheet: Table S3
Table S3. Raw data for Figure 2. Glucosinolate content of two E. cheiranthoides accessions, Elbtalaue and Konstanz, and aphids feeding on these plants.
	Mass spectrometry counts
	Elbtalaue, control					Elbtalaue, 1 hour aphid feeding						Elbtalaue, 8 hours aphid feeding						Elbtalaue, 24 hours aphid feeding						Konstanz, control					Konstanz, 1 hour aphid feeding						Konstanz, 8 hours aphid feeding						Konstanz, 24 hours aphid feeding						Aphids, 1 h on Elbtalaue
Glucosinolate name	1	2	3	4	5	1	2	3	4	5	6	1	2	3	4	5	6	1	2	3	4	5	6	1	2	3	4	5	1	2	3	4	5	6	1	2	3	4	5	6	1	2	3	4	5	6	1	2	3
I3M	1.21994e+06	1.75059e+06	318632	2.1589e+06	1.28128e+06	2.66642e+06	2.01565e+06	1.89288e+06	2.72491e+06	2.56693e+06	1.78799e+06	1.82022e+06	1.91195e+06	2.17069e+06	1.27097e+06	1.49543e+06	2.03642e+06	1.08569e+06	1.08693e+06	1.74576e+06	1.20565e+06	2.17547e+06	1.89916e+06	1.50239e+06	1.06929e+06	1.75576e+06	751396	923716	1.08244e+07	5.01386e+06	5.49989e+06	9.44142e+06	2.66318e+06	1.2827e+06	2.1638e+06	1.9489e+06	2.03209e+06	1.97614e+06	2.20666e+06	2.42207e+06	2.52753e+06	1.56974e+06	2.70741e+06	1.0412e+06	1.39894e+06	1.38664e+06	5303.86	1161.16	5011.74
4MI3M	9.8286e+06	9.12992e+06	1.27317e+06	1.60047e+07	7.50284e+06	1.51484e+07	1.16272e+07	7.14338e+06	2.45753e+07	1.5262e+07	1.65447e+07	1.66824e+07	2.40529e+07	2.0864e+07	7.04394e+06	8.51058e+06	2.16583e+07	1.02602e+07	7.14326e+06	8.61302e+06	6.9805e+06	8.10014e+06	2.51248e+07	3.44003e+07	4.48945e+07	1.12692e+07	2.88118e+07	8.45069e+07	2.39771e+08	1.23082e+08	1.65614e+08	1.42887e+08	5.92116e+07	9.61881e+06	2.72286e+07	1.07724e+08	4.35481e+07	2.9097e+07	4.20942e+07	2.18783e+07	2.51599e+07	4.16438e+07	1.93859e+07	8.08834e+07	1.85492e+07	6.07587e+07	7498.34	12458.5	512.952
4HI3M	2.06127e+06	3.65027e+06	979679	2.89912e+06	2.69199e+06	8.13346e+06	8.52204e+06	8.36836e+06	9.92584e+06	9.17751e+06	3.67448e+06	5.17575e+06	5.23109e+06	5.22077e+06	4.61109e+06	4.97749e+06	7.04323e+06	3.84732e+06	2.58669e+06	4.07686e+06	4.90348e+06	3.32028e+06	4.84769e+06	1.83324e+06	1.80456e+06	1.83995e+06	1.28082e+06	1.50568e+06	4.31727e+06	8.64403e+06	4.48337e+06	8.86142e+06	4.39541e+06	4.22909e+06	3.54839e+06	4.94363e+06	2.93886e+06	2.13041e+06	4.3758e+06	4.81906e+06	2.48372e+06	2.44274e+06	2.7622e+06	2.681e+06	2.61476e+06	2.93596e+06	43205.6	52717.8	52344.3
3MSI	5.30272e+06	1.26832e+07	1.60165e+06	1.25995e+07	6.96123e+06	3.3133e+07	1.95259e+07	7.33062e+06	3.74511e+07	2.17112e+07	1.62827e+07	1.44506e+07	1.42651e+07	1.37108e+07	5.99105e+06	9.96046e+06	1.89811e+07	6.51906e+06	6.03855e+06	1.06457e+07	1.15729e+07	1.18412e+07	1.51745e+07	7.11424e+06	3.32962e+06	6.75527e+06	1.96328e+06	8.65823e+06	3.33674e+07	3.57522e+07	1.80716e+07	6.40129e+07	1.01805e+07	9.32836e+06	1.00177e+07	1.03519e+07	8.22852e+06	1.17308e+07	1.5641e+07	2.06468e+07	1.11996e+07	8.6191e+06	1.21483e+07	6.97264e+06	4.35629e+06	1.1313e+07	108484	112858	125707
3MSO	9.9206e+07	1.24794e+08	2.49326e+07	1.54019e+08	1.52814e+08	5.16712e+08	5.0707e+08	2.83742e+08	7.40875e+08	4.35523e+08	3.02534e+08	2.42901e+08	2.21842e+08	2.74235e+08	2.40521e+08	1.69247e+08	3.01879e+08	1.11062e+08	1.1938e+08	1.40977e+08	1.15846e+08	2.00579e+08	1.32687e+08	9.12679e+07	5.34913e+07	8.20881e+07	3.79773e+07	1.18182e+08	3.02223e+08	5.57994e+08	2.51055e+08	5.19138e+08	1.32411e+08	1.01363e+08	2.21274e+08	2.15034e+08	1.75878e+08	1.65439e+08	1.92975e+08	1.2017e+08	1.31628e+08	1.12095e+08	1.33987e+08	9.36984e+07	5.84315e+07	9.1267e+07	346656	250613	431217
3MTP	1.07112e+06	1.90748e+06	724161	1.53622e+06	1.33685e+06	2.07687e+06	1.36751e+06	545996	3.71306e+06	3.50101e+06	1.7005e+06	1.32654e+06	1.57002e+06	1.286e+06	1.08502e+06	2.12108e+06	5.35658e+06	399147	529569	2.34712e+06	1.84225e+06	1.98472e+06	1.85086e+06	300585	260470	469783	157216	584360	2.37371e+06	1.86493e+06	664902	2.14336e+06	717523	714411	1.01399e+06	834706	860426	753355	656686	867039	489485	530069	588825	429314	332587	1.05636e+06	0	673.115	0
1MB	3.14844e+06	4.97899e+06	601329	6.20579e+06	4.81239e+06	8.24744e+06	6.54983e+06	3.82387e+06	1.25018e+07	7.8412e+06	4.48493e+06	5.74523e+06	7.29442e+06	7.52353e+06	3.16841e+06	4.35376e+06	7.60411e+06	4.27408e+06	2.6682e+06	6.47668e+06	5.28228e+06	5.64396e+06	4.96197e+06	461432	247813	361044	212482	487130	2.1202e+06	1.0215e+06	623631	1.73872e+06	354564	18090.1	600460	819829	521423	495094	878244	735852	700504	632135	801556	474291	312520	694751	49378.5	42861	52145.8
4MSO	115087	93276.2	73609.3	94724.7	129783	469312	432187	312403	431574	340396	314327	154231	166727	145690	126912	213808	267706	84169	80348.6	128543	122189	190858	159340	20330.2	19529.2	65583.9	30230.7	31771.5	129626	287945	227417	115268	68332	125996	75429.3	105476	47570.7	105312	91195.3	69778.4	73324.6	84181.6	73904.8	35211.3	37308.6	96710.4	0	0	465.133
[truncated: 15 more columns]

## Sheet: Table S4
Table S4. Raw data for Figure 3. Cardenolide content of two E. cheiranthoides accessions, Elbtalaue and Konstanz, and aphids feeding on these plants.
	Mass spectrometry counts
	Elbtalaue, control					Elbtalaue, 1 hour aphid feeding						Elbtalaue, 8 hours aphid feeding						Elbtalaue, 24 hours aphid feeding						Konstanz, control					Konstanz, 1 hour aphid feeding						Konstanz, 8 hours aphid feeding						Konstanz, 24 hours aphid feeding						Aphids, 1 h on Elbtalaue
Cardiac glycoside name	1	2	3	4	5	1	2	3	4	5	6	1	2	3	4	5	6	1	2	3	4	5	6	1	2	3	4	5	1	2	3	4	5	6	1	2	3	4	5	6	1	2	3	4	5	6	1	2	3
Cheirotoxin	2.40741e+07	1.97657e+07	2.67833e+07	1.73773e+07	3.01472e+07	2.61604e+07	2.15948e+07	1.80021e+07	2.67495e+07	2.78617e+07	1.88965e+07	3.14384e+07	2.74313e+07	2.8371e+07	2.91186e+07	1.88509e+07	3.40683e+07	2.79951e+07	2.104e+07	2.6258e+07	2.77468e+07	1.57341e+07	2.39963e+07	1.59348e+07	missing	1.80837e+07	1.95428e+07	2.03628e+07	1.68871e+07	1.51921e+07	2.1085e+06	576934	1.20363e+07	1.44944e+07	1.65112e+07	1.20105e+07	1.32518e+07	1.68921e+07	2.11932e+07	1.88959e+07	1.78502e+07	1.70926e+07	2.21524e+07	1.70952e+07	1.13681e+07	1.61214e+07	308857	154221	56180.2
Erysimoside	349082	309704	384957	244549	756618	738595	409059	368846	546381	615801	456188	1.12575e+06	606351	629109	756411	325837	862862	491555	279730	447003	891797	128889	780528	144925	missing	236120	170659	184638	243310	169318	48795.9	19335.9	210221	144182	209474	108211	226401	166668	338396	225409	179971	192421	213803	262685	114973	245839	61306.4	44836.6	46390.2
Erychroside	7.09148e+07	6.40444e+07	7.29221e+07	6.24636e+07	9.41207e+07	8.31179e+07	7.94153e+07	7.4755e+07	8.51907e+07	8.68249e+07	8.80765e+07	1.00225e+08	7.97877e+07	9.31685e+07	7.95593e+07	7.43081e+07	9.6932e+07	8.11888e+07	8.13236e+07	8.47926e+07	9.14063e+07	4.0071e+07	7.36226e+07	4.89625e+07	missing	4.04138e+07	4.62613e+07	4.91114e+07	3.8096e+07	4.18663e+07	2.53986e+07	655348	2.48651e+07	3.17055e+07	3.149e+07	1.73564e+07	3.82882e+07	3.88429e+07	5.6541e+07	5.00822e+07	5.02457e+07	5.3939e+07	4.40817e+07	4.03651e+07	2.91223e+07	5.17686e+07	2.96297e+06	2.31529e+06	3.7941e+06
Glucodigitoxigenin	1.76933e+06	737532	1.31188e+06	909505	2.41434e+06	3.12015e+06	1.03661e+06	682028	1.7418e+06	2.43349e+06	2.12823e+06	2.67101e+06	2.59339e+06	2.7849e+06	2.30074e+06	948379	2.09902e+06	1.55458e+06	898298	1.40795e+06	2.79002e+06	686344	3.54625e+06	1.61997e+06	missing	1.63682e+06	3.20392e+06	1.59549e+06	3.2019e+06	1.22693e+06	513927	319428	3.38399e+06	2.81098e+06	3.67609e+06	952093	3.46019e+06	2.79887e+06	3.57057e+06	2.06882e+06	1.91797e+06	1.50822e+06	2.30119e+06	4.58327e+06	1.6728e+06	3.99292e+06
Helveticoside	1.58958e+07	1.5252e+07	1.67429e+07	1.26781e+07	1.72553e+07	1.37182e+07	1.06353e+07	9.95105e+06	1.35504e+07	1.62479e+07	1.58362e+07	1.66004e+07	1.59849e+07	1.68184e+07	1.46922e+07	1.36166e+07	1.81003e+07	1.48587e+07	1.33286e+07	1.49567e+07	1.66489e+07	1.28451e+07	1.82603e+07	8.42686e+06	missing	8.69006e+06	1.04234e+07	7.79564e+06	9.72256e+06	9.37369e+06	4.32519e+06	3.20031e+06	9.59352e+06	1.02061e+07	9.25317e+06	7.93848e+06	1.08885e+07	1.11593e+07	1.0943e+07	8.48055e+06	8.53255e+06	6.96153e+06	9.23013e+06	1.12731e+07	8.6608e+06	7.81112e+06	109828	53811.3	50155.1
Erycordin	2.79426e+06	1.05112e+06	2.1716e+06	953360	5.02725e+06	4.05625e+06	1.98082e+06	1.28563e+06	3.30391e+06	3.98467e+06	1.4058e+06	5.78861e+06	3.70166e+06	4.44858e+06	4.47101e+06	1.32801e+06	5.98778e+06	2.84528e+06	1.22348e+06	2.38734e+06	6.66384e+06	1.06005e+06	4.75375e+06	1.56323e+06	missing	1.37744e+06	1.8714e+06	2.47552e+06	8.23053e+06	4.47787e+06	220606	201185	6.06679e+06	1.54612e+06	2.59515e+06	1.0234e+06	2.91281e+06	1.65323e+06	3.24121e+06	2.89854e+06	1.45061e+06	3.16983e+06	1.97267e+06	3.07352e+06	806133	1.47478e+07	220245	108006	65078.2
Dig-10	7.53126e+07	7.57762e+07	8.1192e+07	7.2007e+07	1.04694e+08	8.40959e+07	7.71095e+07	7.42078e+07	9.64616e+07	9.5786e+07	6.92161e+07	1.04251e+08	9.13233e+07	1.00815e+08	9.82364e+07	7.37052e+07	1.11787e+08	8.03762e+07	7.6592e+07	8.69288e+07	7.93584e+07	6.773e+07	8.95402e+07	6.33634e+07	missing	6.8076e+07	6.69922e+07	7.00862e+07	8.23794e+07	6.40168e+07	2.04959e+07	1.85594e+07	5.14158e+07	6.26366e+07	7.05984e+07	6.13988e+07	6.89296e+07	6.27956e+07	8.0243e+07	7.50532e+07	6.51738e+07	6.57142e+07	7.50385e+07	6.9408e+07	5.06926e+07	6.47277e+07	441857	311794	650638
[truncated: 15 more columns]

## Sheet: Table S5
Table S5. Raw data for Figure 4. Effects of glucosinolates and cardenolides on aphid reproduction.
Figure 4A, raw data for Pearsson correlation, not normalized																		Figure 4B, raw data for helveticoside artificial diet experiment
F2 line	Cheirotoxin	Erysimoside	Erychroside	Helveticoside	Glucodigitoxigenin	Dig_10	Erycordin	I3M	4MOI3M	4HI3M	3MSI	3MSO	4MSO	3MTP	NMB	# of aphis		Concentration (ng/ul)	Replicate	# adults	# nymphs
F2-1	4629.52	49956.4	952527	571316	348264	133288	28822.1	2.95911e+06	3.2547e+07	1.45762e+07	2.6516e+07	1.52652e+09	3.02756e+06	8.12387e+06	3.54019e+06	9		0.001	1	7	19
F2-2	11541.4	260964	2.45033e+06	465228	681481	525325	98339	4.10366e+06	2.67827e+07	4.36179e+07	1.79445e+07	1.27898e+09	3.69107e+06	6.16756e+06	1.94369e+06	10			2	6	13
F2-3	9926.07	48683.6	581223	694093	480759	85076.2	28866.9	1.51819e+06	1.67451e+07	2.35427e+07	8.73983e+06	4.33737e+08	442971	725518	2.76021e+06	22			3	4	10
F2-4	12244.6	224116	2.50641e+06	1.03298e+06	1.37295e+06	596058	88653.2	2.34819e+06	9.0899e+06	3.87623e+07	1.24784e+07	7.96002e+08	1.37586e+06	1.24384e+06	2.29375e+06	6			4	5	20
F2-5	10738.2	144958	1.95353e+06	727932	727822	344292	82518.8	2.96244e+06	1.09318e+07	2.02314e+07	3.74198e+07	1.21409e+09	1.71493e+06	3.85531e+06	1.16263e+07	18			5	5	13
F2-6	19569.7	291453	3.68718e+06	1.01181e+06	2.32759e+06	796028	150607	3.6807e+06	3.33955e+07	3.44832e+07	4.10685e+07	1.6463e+09	2.97898e+06	3.43815e+06	4.35241e+06	9		12.5	1	5	5
F2-7	25033.5	353260	7.23532e+06	917251	1.33132e+06	1.37768e+06	200548	4.52626e+06	6.9723e+06	4.70369e+07	4.64185e+07	1.68419e+09	3.08666e+06	4.55968e+06	1.98125e+06	8			2	5	5
F2-8	65677.4	468407	4.34265e+06	839619	1.98262e+06	1.41906e+06	253256	5.82414e+06	2.24973e+07	4.4565e+07	2.17796e+07	1.78889e+09	3.08873e+06	1.41004e+06	2.97898e+06	6			3	7	6
F2-9	45640.9	583237	6.19975e+06	1.72186e+06	3.2933e+06	1.95521e+06	310850	1.38202e+07	3.81702e+07	5.11444e+07	5.57353e+07	1.78146e+09	2.44108e+06	8.41459e+06	5.30644e+06	16			4	7	18
F2-10	34079.1	501913	7.04996e+06	1.20047e+06	1.89584e+06	1.74334e+06	275795	5.61367e+06	3.04542e+07	2.01059e+07	4.46954e+07	1.52605e+09	3.83145e+06	4.6337e+06	3.4538e+06	8			5	4	10
F2-11	12918.5	301051	4.55923e+06	982826	1.87274e+06	665262	125849	5.84235e+06	2.58015e+07	4.12971e+07	3.34901e+07	2.20683e+09	3.76433e+06	1.15784e+07	1.71703e+07	19		25	1	4	0
F2-12	40478.2	338126	4.93109e+06	5.84585e+06	3.11192e+06	1.8379e+06	237331	6.76377e+06	7.28821e+07	5.27471e+07	6.47601e+06	7.6743e+08	837584	1.09852e+06	3.42106e+06	0			2	6	2
F2-13	18173.1	275009	4.19815e+06	1.16648e+06	1.29828e+06	1.39707e+06	153792	4.11706e+06	2.90695e+07	7.0664e+07	1.06822e+07	1.31223e+09	1.93915e+06	2.37196e+06	1.22297e+07	0			3	8	8
F2-14	78409.3	256487	1.53995e+06	1.40327e+06	1.24288e+06	1.22078e+06	156200	6.08779e+06	1.84836e+06	3.43718e+07	1.53788e+06	4.55644e+08	402452	285736	1.25784e+06	0			4	4	2
F2-15	31543.9	275471	4.06448e+06	1.54731e+06	1.08902e+06	1.78365e+06	136697	3.62714e+06	3.07793e+07	1.8515e+07	1.33754e+07	1.21999e+09	1.87809e+06	748631	1.99677e+06	0			5	4	4
F2-16	14501.5	210037	2.29816e+06	309255	899913	657048	114314	4.88573e+06	1.41718e+07	4.56311e+07	2.61615e+07	1.72865e+09	2.26327e+06	4.24496e+06	4.27807e+06	9		37.5	1	2	0
F2-17	12280.9	217803	2.08216e+06	454184	673606	351586	101541	2.87967e+06	8.18098e+06	2.57959e+07	3.24195e+07	1.16801e+09	1.3827e+06	2.17202e+06	3.87037e+06	13			2	4	0
F2-18	52960.7	588910	8.4086e+06	1.41993e+06	1.70131e+06	3.38249e+06	293827	7.42001e+06	7.87613e+06	5.50411e+07	1.95258e+07	1.78501e+09	2.68904e+06	2.38075e+06	4.75495e+06	7			3	5	0
F2-19	32163.9	30987.9	858876	2.11534e+06	681733	302363	57193.1	4.77532e+06	1.56651e+07	3.88704e+07	5.06382e+06	6.00989e+08	688955	400349	1.79049e+06	4			4	6	2
F2-20	23608.1	144702	4.31031e+06	4.56374e+06	1.51246e+06	1.00654e+06	90622.5	821799	7.76015e+06	6.24834e+06	1.0037e+07	5.40945e+08	891182	172625	692129	8			5	5	0
F2-21	29565.6	312094	2.54773e+06	755109	1.12457e+06	1.58799e+06	135206	5.56478e+06	2.92545e+06	4.79303e+07	3.0461e+07	1.63817e+09	2.33147e+06	7.15041e+06	4.36864e+06	17		50	1	2	0
F2-22	23700.7	521634	7.0228e+06	691322	654415	1.27269e+06	137684	3.96543e+06	5.60553e+07	7.90073e+07	2.55174e+07	2.05681e+09	6.10757e+06	2.1324e+06	4.21736e+06	16			2	2	1
F2-23	49502.5	598331	4.84973e+06	4.99106e+06	2.07452e+06	675884	224151	1.68295e+06	7.04009e+06	8.57118e+06	4.51164e+06	3.45203e+08	511370	411220	1.83518e+06	0			3	3	4
F2-24	59723.2	489660	4.57343e+06	1.56722e+06	1.15149e+06	1.49599e+06	266752	3.38606e+06	1.58508e+07	1.08818e+07	2.51681e+06	3.1433e+08	357935	97384.2	604254	0			4	2	3
F2-25	17617.5	283989	1.6526e+06	1.27013e+06	1.42805e+06	325631	111253	591404	1.57052e+07	2.45347e+06	1.50959e+06	6.75105e+07	185613	279721	536716	0			5	4	1
F2-26	47602.1	1.37286e+06	1.20381e+07	3.73821e+06	2.39454e+06	2.61647e+06	339895	6.43046e+06	4.93189e+06	5.87524e+07	1.41763e+07	1.37931e+09	2.15733e+06	1.06492e+07	3.23808e+06	0		62.5	1	0	0
F2-27	36340.7	428613	4.81298e+06	808030	1.49939e+06	1.58402e+06	234989	4.4808e+06	6.32204e+06	2.99275e+07	5.22876e+06	8.45234e+08	1.16388e+06	8.40104e+06	2.30321e+06	2			2	2	0
F2-28	11085.8	125835	945974	3.27409e+06	1.8723e+06	395354	60550.1	2.07655e+06	1.15163e+07	5.47681e+06	1.12157e+06	1.79092e+08	225617	709001	1.12414e+06	0			3	3	1
F2-29	39161.2	339573	2.52209e+06	1.1686e+06	1.40003e+06	1.18757e+06	192023	3.57551e+06	1.81808e+07	2.53844e+07	1.62347e+07	1.43662e+09	2.04119e+06	1.27596e+07	1.33018e+07	3			4	0	0
F2-30	41532.6	738748	6.91553e+06	4.03265e+06	1.69041e+06	2.61461e+06	238953	4.06853e+06	6.24205e+06	4.14389e+07	1.89351e+07	1.07148e+09	1.67445e+06	8.59942e+06	2.84625e+06	8			5	4	2
F2-31	31070.4	928884	7.02747e+06	6.60899e+06	1.83187e+06	1.6423e+06	231951	1.69459e+06	4.02352e+06	3.16311e+07	7.71711e+06	1.02812e+09	1.5838e+06	8.42368e+06	8.80941e+06	0		75	1	1	1
F2-32	26678.1	401545	5.92284e+06	1.73348e+06	692950	1.2963e+06	144545	2.15059e+06	1.80237e+07	1.43676e+07	3.87999e+06	4.81907e+08	840857	1.47145e+06	469650	0			2	4	1
F2-33	44425.3	474657	3.79607e+06	977515	1.31576e+06	1.24431e+06	292094	4.73586e+06	2.67296e+06	3.57479e+07	3.81328e+06	6.4612e+08	814807	8.25663e+06	1.8689e+06	0			3	1	0
F2-34	31614.8	464222	3.14334e+06	1.91746e+06	938495	529719	173009	2.74303e+06	1.05184e+07	2.23366e+07	1.25115e+07	6.6946e+08	636828	6.34821e+06	1.23124e+06	11			4	3	2
F2-35	43686.2	812942	1.2712e+07	1.66902e+06	1.90066e+06	2.17641e+06	214703	5.2033e+06	5.36307e+06	4.84708e+07	3.26663e+07	2.08022e+09	4.55744e+06	4.82467e+07	5.68856e+06	5			5	3	0
F2-36	19322	346362	4.04453e+06	749890	993597	824274	111127	2.78413e+06	1.16498e+07	2.93665e+07	1.73054e+07	1.09549e+09	1.81388e+06	2.09531e+07	1.14093e+06	0		100	1	1	0
F2-37	15403	244784	3.26344e+06	661896	1.00292e+06	891030	130175	3.98202e+06	5.12981e+06	3.24183e+07	1.03848e+07	7.90457e+08	975203	9.09963e+06	8.18098e+06	0			2	3	4
F2-38	32124.5	632126	8.763e+06	1.20715e+06	2.62452e+06	1.70271e+06	237702	7.24144e+06	1.05359e+07	4.95761e+07	3.43847e+07	2.28277e+09	3.48174e+06	3.92826e+07	5.94405e+06	12			3	2	0
F2-39	28989.9	525751	6.25597e+06	2.04348e+06	1.65155e+06	948924	177300	4.05845e+06	2.86985e+07	2.40173e+07	1.91213e+07	9.66231e+08	1.27578e+06	9.93383e+06	9.37339e+06	17			4	2	1
F2-40	14031.5	287250	3.76194e+06	403080	474032	433238	85534.2	2.35702e+06	3.63116e+06	1.46305e+07	8.88554e+06	7.76885e+08	1.16778e+06	2.33706e+06	5.33158e+06	18			5	1	0
F2-41	16469.3	259841	2.81405e+06	653310	670431	620507	90955.6	3.16296e+06	1.75064e+07	2.83444e+07	8.56294e+06	7.68172e+08	1.27184e+06	4.13942e+06	8.23689e+06	0
F2-42	24048.3	435179	3.1292e+06	2.47872e+06	1.24667e+06	1.15659e+06	161677	5.3629e+06	6.562e+06	4.57217e+07	4.76126e+06	5.09426e+08	680628	3.7471e+06	2.32105e+06	0
F2-43	33830.1	369980	1.68177e+06	1.22351e+06	937014	1.18354e+06	173447	6.95711e+06	532734	1.80804e+07	1.80905e+06	2.40081e+08	281619	1.35365e+06	686802	0
F2-44	37116	767192	1.03061e+07	1.00709e+06	3.192e+06	2.78865e+06	264982	7.33737e+06	7.19177e+06	5.35311e+07	1.66629e+07	1.75927e+09	2.88928e+06	2.20198e+07	1.98087e+07	5
F2-45	31552.2	365087	3.94249e+06	765758	1.60542e+06	1.15247e+06	143883	3.52477e+06	8.7192e+06	2.06472e+07	2.39045e+07	1.25737e+09	1.82046e+06	1.84274e+07	3.22722e+06	6
F2-46	81905.9	1.26406e+06	2.01001e+07	2.34672e+06	3.41261e+06	3.28957e+06	343592	5.5383e+06	2.88799e+07	4.35541e+07	8.17087e+07	2.03332e+09	4.68611e+06	2.39811e+07	4.62982e+06	14
F2-47	25255.4	547772	7.65382e+06	2.05032e+06	1.29922e+06	1.31649e+06	184368	4.25306e+06	1.54002e+07	3.30999e+07	3.6885e+07	1.3597e+09	3.36772e+06	2.02839e+07	1.12119e+07	10
F2-48	28180.3	414631	8.19791e+06	1.24486e+06	1.7148e+06	1.1336e+06	194970	4.40359e+06	1.6827e+07	2.62693e+07	2.82707e+07	1.92496e+09	3.48688e+06	1.61073e+07	4.97652e+06	14
F2-49	25836	328926	5.76423e+06	836884	1.48544e+06	988070	145276	2.43932e+06	1.74955e+07	2.05614e+07	2.79495e+07	1.20265e+09	1.75292e+06	9.28754e+06	3.33663e+06	22
F2-50	22589	516247	9885662	1099758	2275002	984438	166148	5.85198e+06	3.85132e+07	7.74984e+07	2.59042e+07	1.55125e+09	3.16297e+06	1.35349e+07	3.14634e+06	9
F2-51								1.10408e+07	7.95016e+07	1.19049e+08	3.54939e+07	1.8645e+09	3.74307e+06	658982	3.38615e+06	13
F2-52	33112.1	396790	4.59623e+06	958144	2.36351e+06	1.62044e+06	235618	6.75215e+06	2.04911e+07	6.87786e+07	2.46762e+07	1.53367e+09	2.11581e+06	3.2805e+07	2.79634e+06	15
F2-53	13215.4	222856	2.32263e+06	518715	745512	485951	77241.1	1.05387e+07	9.91687e+06	6.19873e+07	3.59037e+07	1.57098e+09	3.25362e+06	1.65887e+07	2.96965e+06	20
F2-54	23040.8	576986	1.03658e+07	3.84345e+06	2.15938e+06	1.29293e+06	171016	6.75278e+06	5.33761e+07	8.99846e+07	4.26995e+07	1.68252e+09	4.08596e+06	1.5296e+07	1.65663e+07	8
F2-55	29030.6	347809	5.55049e+06	770755	1.64823e+06	1.85574e+06	193743	3.17951e+06	1.9974e+07	2.72969e+07	4.63915e+07	1.30975e+09	1.98842e+06	1.45438e+07	2.13893e+06	17
F2-56	25748.3	640398	1.00921e+07	1.69269e+06	1.74881e+06	1.86807e+06	167123	6.42809e+06	2.83182e+07	8.23093e+07	4.67569e+07	2.12033e+09	4.75843e+06	2.54894e+07	6.21178e+06	2
F2-57	34768.5	500968	7.85945e+06	900505	1.24489e+06	1.16758e+06	182198	3.79172e+06	9.88737e+06	2.22485e+07	2.68624e+07	1.18698e+09	1.67212e+06	9.04246e+06	2.40198e+06	21
F2-58	30559.8	505977	7.31616e+06	1.29269e+06	1.17131e+06	1.05932e+06	142041	6.18649e+06	3.48116e+06	6.14829e+07	2.21425e+07	1.15215e+09	2.186e+06	1.19298e+07	1.51469e+06	2
F2-59	23522.8	482242	5.41871e+06	689695	804961	887999	108899	1.88297e+06	5.05382e+06	1.66022e+07	7.43159e+06	5.72874e+08	1.81563e+06	857132	2.94754e+06	0
F2-60	20495.7	338441	6.61231e+06	741470	1.0303e+06	3.42326e+06	180589	2.14154e+06	8.41737e+06	2.52093e+07	1.25787e+07	1.10676e+09	2.021e+06	4.51297e+06	1.98735e+06	11
F2-61	7882.26	196721	2.99542e+06	694959	312538	320648	52109.6	1.25539e+06	4.244e+06	9.40618e+06	1.02897e+07	7.87641e+08	3.17012e+06	1.69178e+06	497145	0
F2-62	21033.9	291147	5.70043e+06	1.96704e+06	1.55029e+06	1.14575e+06	141730	2.54312e+06	4.29129e+07	1.91943e+07	1.71746e+07	1.19347e+09	1.95226e+06	8.02073e+06	3.22808e+06	10
F2-63	12710.5	266429	3.766e+06	570065	883994	483874	103524	7.80885e+06	4.08877e+07	7.34199e+07	5.17172e+07	1.30177e+09	2.46489e+06	1.14874e+07	1.1442e+07	8
F2-64	22077.5	284655	6.46196e+06	1.28283e+06	2.16968e+06	666303	131450	2.53072e+06	2.89773e+07	9.53582e+06	1.53882e+07	8.87198e+08	1.57837e+06	9.62333e+06	951017	6
F2-65	18845.1	119181	1.04073e+06	778587	480447	1.39915e+06	66946.9	688926	4.85712e+06	578261	450469	4.74531e+07	144666	52836.5	128729	0
F2-66	23327.1	697981	8.33943e+06	1.08043e+06	844367	2.48853e+06	124176	4.35089e+06	1.39911e+07	5.67127e+07	1.933e+07	1.89933e+09	6.55012e+06	1.15708e+07	3.65571e+06	0
F2-67	23254.4	524315	9.78598e+06	741184	2.32448e+06	2.05341e+06	186907	6.06905e+06	1.1526e+07	5.54012e+07	3.12702e+07	1.93571e+09	3.29653e+06	3.28227e+07	3.43437e+06	15
F2-68	15881.7	306635	6.03189e+06	764394	1.18399e+06	554161	93192	4.91448e+06	2.62535e+07	4.07316e+07	1.96617e+07	1.11494e+09	1.71846e+06	1.28095e+07	1.1907e+07	16
F2-69	33857.8	760463	1.04617e+07	715994	1.08912e+06	1.49042e+06	186906	2.44045e+06	3.37748e+07	6.87513e+07	1.17329e+07	1.32205e+09	3.40021e+06	4.0905e+06	1.39455e+06	14
F2-70	34505.7	29029.5	261209	1.43752e+06	903451	124319	26968	3.50607e+06	1.13863e+06	953254	488128	1.33532e+07	7235.46	21839.1	633098	0
F2-71	30381.1	402674	8.2324e+06	1.21846e+06	1.32887e+06	1.25937e+06	197159	2.74773e+06	1.22149e+07	1.75091e+07	1.78139e+07	7.65992e+08	1.15699e+06	4.91625e+06	7.3469e+06	10
F2-72	31687.9	583960	8.62062e+06	817034	860531	1.80778e+06	167180	2.40592e+06	3.18684e+07	3.62694e+07	2.08843e+07	1.61053e+09	3.99716e+06	5.31585e+06	9.57954e+06	17
F2-73	44867.8	968492	1.37297e+07	1.17724e+06	4.93997e+06	2.86043e+06	293062	9.92408e+06	2.39715e+07	7.85263e+07	2.20834e+07	1.66733e+09	2.80943e+06	4.69955e+07	1.43453e+07	24
F2-74	56288.1	800881	1.49612e+07	1.87331e+06	2.85233e+06	2.41099e+06	257392	6.30649e+06	5.04876e+07	4.78786e+07	3.40975e+07	2.10694e+09	4.42406e+06	3.20654e+07	5.78011e+06	17
F2-75	41202.8	894429	1.40163e+07	2.16537e+06	1.85564e+06	2.8456e+06	304569	2.34113e+06	9.174e+06	1.85241e+07	3.1075e+07	1.29304e+09	2.47944e+06	1.25562e+07	8.88595e+06	0
F2-76	25694.2	560498	8.32737e+06	1.06982e+06	1.65235e+06	1.34537e+06	221570	5.28642e+06	5.74768e+07	6.48405e+07	2.57656e+07	1.99381e+09	4.27919e+06	3.12883e+07	4.31141e+06	14
F2-77	23056.8	433252	6.52044e+06	943211	1.00884e+06	1.08764e+06	121422	2.72021e+06	3.53967e+07	2.70051e+07	2.21375e+07	1.47192e+09	2.62516e+06	1.71937e+07	3.85808e+06	7
F2-78	41495.1	521780	8.15044e+06	978819	2.09845e+06	1.86442e+06	240858	3.35956e+06	1.00661e+07	2.23309e+07	2.26388e+07	1.3942e+09	1.8851e+06	2.3071e+07	1.39783e+06	20
F2-79	28621	557166	6.8154e+06	1.53531e+06	1.47973e+06	1.61186e+06	224981	2.57998e+06	5.27319e+07	4.16992e+07	1.70477e+07	1.37291e+09	2.18442e+06	1.25891e+07	1.1113e+07	14
F2-80	24254.1	337168	5.19618e+06	1.20818e+06	1.52841e+06	786054	169748	2.27591e+06	6.31149e+06	2.91044e+07	1.02122e+07	7.8023e+08	1.09329e+06	1.30048e+07	2.45968e+06	0
F2-81	22223.6	344515	4.45287e+06	567153	1.23173e+06	864829	143857	3.69263e+06	2.24073e+06	3.03876e+07	8.8515e+06	7.65386e+08	768231	1.46318e+07	5.83165e+06	4
F2-82	23809.6	511567	9.97698e+06	788538	2.62227e+06	1.64301e+06	191135	2.33614e+06	1.12974e+07	3.17827e+07	2.87727e+07	1.90127e+09	3.15965e+06	2.07911e+07	4.54993e+06	19
F2-83	47387.9	581763	1.14756e+07	1.44015e+06	2.60418e+06	1.18927e+06	167582	5.06223e+06	9.10298e+06	2.66313e+07	2.51218e+07	1.4443e+09	2.33606e+06	2.07728e+07	2.81101e+06	18

## Sheet: Table S6
Table S6. Raw data for Figure 5. Quantitative trait loci (QTL) affecting helveticoside abundance.
Figure 5B. Helveticoside
Mas spectrometry counts
Elbtalaue	Konstanz	Heterozygote
309255	1.1686e+06	403080
465228	1.17724e+06	454184
518715	1.22351e+06	567153
570065	1.69269e+06	653310
691322	1.87331e+06	661896
694093	3.84345e+06	689695
694959	4.03265e+06	715994
808030	4.99106e+06	727932
839619	5.84585e+06	741184
982826		741470
1.08043e+06		749890
1099758		755109
1.16648e+06		764394
1.20047e+06		765758
1.20715e+06		770755
1.21846e+06		778587
1.27013e+06		788538
1.40327e+06		817034
1.54731e+06		836884
1.66902e+06		900505
1.73348e+06		917251
1.96704e+06		943211
2.05032e+06		958144
2.11534e+06		977515
3.27409e+06		978819
4.56374e+06		1.00709e+06
6.60899e+06		1.01181e+06
		1.03298e+06
		1.06982e+06
		1.20818e+06
		1.24486e+06
		1.28283e+06
		1.29269e+06
		1.41993e+06
		1.43752e+06
		1.44015e+06
		1.53531e+06
		1.56722e+06
		1.72186e+06
		1.91746e+06
		2.04348e+06
		2.16537e+06
		2.34672e+06
		2.47872e+06
		3.73821e+06

## Sheet: Table S7
Table S7. Raw data for Figure 6. Quantitative trait loci (QTL) affecting aliphatic glucosinolate abundance.
Figure 6B. n-Methylbutylglucosinolate				Figure 6D. 3MSIP + 3MSOP + 4MSOB
Mass spectrometry counts				Sum of mass spectrometry counts
Elbtalaue	Konstanz	Heterozygote		Elbtalaue	Konstanz	Heterozygote
1.83518e+06	128729	536716		1.38486e+07	6.92057e+07	4.80482e+07
2.96965e+06	469650	633098		2.42172e+08	1.8044e+08	4.86628e+08
8.23689e+06	497145	686802		3.17205e+08	3.50226e+08	5.51873e+08
8.80941e+06	604254	1.12414e+06		4.42919e+08	8.01101e+08	6.06742e+08
8.88595e+06	692129	1.23124e+06		4.57585e+08	8.09857e+08	6.82609e+08
9.37339e+06	951017	1.25784e+06		5.14868e+08	9.04165e+08	7.74744e+08
1.1113e+07	1.14093e+06	1.79049e+06		5.82121e+08	9.86629e+08	7.75006e+08
1.1442e+07	1.39455e+06	1.8689e+06		6.50748e+08	1.09209e+09	7.78007e+08
1.16263e+07	1.39783e+06	1.98125e+06		7.84963e+08	1.11461e+09	8.01817e+08
1.1907e+07	1.51469e+06	1.98735e+06		7.86938e+08	1.23235e+09	8.51627e+08
1.22297e+07	1.94369e+06	2.13893e+06		7.91536e+08	1.23524e+09	1.12136e+09
1.33018e+07	1.99677e+06	2.29375e+06		1.03742e+09	1.25323e+09	1.13632e+09
1.43453e+07	2.79634e+06	2.30321e+06		1.20181e+09	1.30061e+09	1.17648e+09
1.65663e+07	2.81101e+06	2.32105e+06		1.47176e+09	1.33719e+09	1.2126e+09
1.98087e+07	2.94754e+06	2.40198e+06		2.24409e+09	1.35595e+09	1.21551e+09
	3.14634e+06	2.45968e+06			1.35813e+09	1.2831e+09
	3.42106e+06	2.76021e+06			1.39215e+09	1.32485e+09
	3.43437e+06	2.84625e+06			1.39996e+09	1.32659e+09
	3.4538e+06	2.97898e+06			1.56046e+09	1.39564e+09
	4.62982e+06	3.22722e+06			1.57458e+09	1.41872e+09
	5.68856e+06	3.22808e+06			1.61014e+09	1.45489e+09
		3.23808e+06			1.63541e+09	1.49668e+09
		3.33663e+06			1.67096e+09	1.58032e+09
		3.65571e+06			1.69035e+09	1.69222e+09
		3.85808e+06			1.83963e+09	1.72931e+09
		3.87037e+06			1.90374e+09	1.7337e+09
		4.21736e+06			1.95672e+09	1.75708e+09
		4.27807e+06			2.02385e+09	1.77883e+09
		4.31141e+06			2.08843e+09	1.80722e+09
		4.35241e+06			2.17184e+09	1.81376e+09
		4.36864e+06			2.32064e+09	1.92521e+09
		4.54993e+06				1.9332e+09
		4.75495e+06				1.97028e+09
		4.88883e+06				2.11745e+09
		4.97652e+06				2.11972e+09
		5.30644e+06				2.14546e+09
		5.33158e+06
		5.78011e+06
		5.83165e+06
		5.94405e+06
		6.21178e+06
		7.3469e+06
		8.18098e+06
		9.57954e+06
		1.12119e+07
		1.71703e+07

## Sheet: Table S8
Table S8. Raw data for Figure 7. Quantitative trait loci (QTL) affecting indole glucosinolate abundance.
Figure 7C. (4MI3M)/(4MI3M + 4HI3M), Chromosome 2				Figure 7D. (4MI3M)/(4MI3M + 4HI3M), Chromosome 2				Figure 7G. (4MI3M + 4HI3M )/(I3M + 4MI3M + 4HI3M)
Ratio of spectrometry counts				Ratio of spectrometry counts				Ratio of spectrometry counts
Elbtalaue	Konstanz	Heterozygote		Elbtalaue	Konstanz	Heterozygote		Elbtalaue	Konstanz	Heterozygote
0.0575245	0.384531	0.6244		0.0575245	0.250318	0.125182		0.373688	0.865998	0.887509
0.174403	0.0510312	0.240781		0.174403	0.580137	0.415032		0.727921	0.87217	0.889989
0.0695706	0.112847	0.450962		0.0695706	0.287246	0.130913		0.856108	0.891107	0.892193
0.317529	0.125508	0.864887		0.317529	0.553961	0.0996226		0.875915	0.892486	0.892835
0.25474	0.398707	0.677704		0.25474	0.59294	0.422544		0.885685	0.900066	0.894462
0.427368	0.390451	0.320147		0.427368	0.415637	0.236976		0.887576	0.90137	0.894508
0.125182	0.331977	0.175271		0.6244	0.556435	0.0774427		0.890264	0.907293	0.898333
0.415032	0.752401	0.5444		0.240781	0.40041	0.417324		0.906969	0.91319	0.902687
0.130913	0.329426	0.118436		0.450962	0.690949	0.198841		0.915381	0.915777	0.904117
0.0996226	0.602336	0.296911		0.864887	0.893612	0.0286215		0.919903	0.919378	0.906043
0.422544	0.291472	0.137918		0.677704		0.350793		0.921868	0.92138	0.908287
0.250318	0.380433	0.307674		0.320147		0.229541		0.935468	0.928516	0.911725
0.129095	0.284029	0.0535859		0.175271		0.255978		0.939618	0.929681	0.911864
	0.13662	0.357699		0.5444		0.233368			0.931462	0.913051
	0.189958	0.197883		0.118436		0.491988			0.936054	0.916858
	0.381812	0.391931		0.296911		0.310911			0.936436	0.919487
	0.45972	0.467705		0.137918		0.172217			0.936978	0.920006
	0.37232	0.233873		0.307674		0.54431			0.938341	0.920093
	0.513262	0.331214		0.0535859		0.410943			0.939764	0.922064
	0.469899	0.335469		0.357699		0.0686742			0.94203	0.922675
	0.567238	0.262242		0.197883		0.602336			0.94492	0.922944
	0.310711	0.236976		0.391931		0.291472			0.945085	0.924152
	0.558417	0.0774427		0.467705		0.380433			0.947322	0.924473
	0.178211	0.417324		0.233873		0.284029			0.948564	0.928971
		0.198841		0.331214		0.13662			0.953224	0.931648
		0.0286215		0.335469		0.189958			0.958229	0.93774
		0.350793		0.262242		0.381812			0.965895	0.93975
		0.229541		0.384531		0.45972			0.968458	0.940127
		0.255978		0.0510312		0.37232			0.973405	0.940915
		0.233368		0.112847		0.513262			0.97675	0.944586
		0.491988		0.125508		0.469899				0.948562
		0.310911		0.398707		0.567238				0.948911
		0.172217		0.390451		0.310711				0.951979
		0.54431		0.331977		0.558417				0.954628
		0.410943		0.752401		0.178211				0.955016
		0.0686742		0.329426						0.958572
		0.580137								0.960356
		0.287246								0.960663
		0.553961								0.963685
		0.59294								0.971478
		0.415637
		0.556435
		0.40041
		0.690949
		0.377628

## Sheet: Table S9
Table S9. Raw data for graphs shown in Figure 8
Figure 8B. IGMT gene expression in parental lines					Figure 8C,D,E. Correlation of IGMT expression and indole glucosinolate methylation ratio
genotype	Erche01g022140	Erche01g022141	Erche01g022144		F2 Line#	Erche01g022140	Erche01g022141	Erche01g022144	(4MI3M)/(4MI3M + 4HI3M)
Elbtalaue-1	359.697	4.55313	168.466		F1	309.207	0	0	0.690678
Elbtalaue-2	81.9532	0.581228	16.2744		F10	361.34	0	34.0084	0.602336
Elbtalaue-3	45.5942	4.05282	20.2641		F11	71.4282	3.10557	31.0557	0.384531
Elbtalaue-4	141.088	1.45451	18.9087		F12	463.601	13.0797	341.524	0.580137
Elbtalaue-5	122.356	1.16529	24.4712		F13	57.0614	3.00323	12.0129	0.291472
Konstanz-1	448.195	2.44581	81.3233		F14	24.7311	1.03046	12.3656	0.0510312
Konstanz-2	891.603	15.9048	316.224		F15	177.398	2.07483	85.068	0.6244
Konstanz-3	371.104	2.35373	111.41		F16	208.808	1.94542	47.3385	0.236976
Konstanz-4	837.527	0.882536	262.113		F17	86.1739	9.84844	88.636	0.240781
Konstanz-5	1044.3	7.40116	247.199		F18	48.8364	0.921441	11.0573	0.125182
					F19	258.887	2.87652	92.7678	0.287246
					F2	42.2958	2.30704	0	0.380433
					F20	241.407	2.7748	71.4511	0.553961
					F21	36.3141	1.81571	4.84189	0.0575245
					F22	143.519	2.20798	15.4559	0.415032
					F23	375.755	5.90191	184.927	0.450962
					F24	290.168	13.9993	237.988	0.59294
					F25	778.527	18.773	607.361	0.864887
					F26	9.11853	0	5.47112	0.0774427
					F27	40.8329	0	16.8964	0.174403
					F28	588.461	4.11511	229.418	0.677704
					F29	99.3271	1.35139	22.2979	0.417324
					F3	334.119	10.9747	223.152	0.415637
					F30	15.3829	0	15.3829	0.130913
					F31	104.77	0	14.2869	0.112847
					F32	148.158	1.70296	49.3859	0.556435
					F33	50.713	0	20.5593	0.0695706
					F34	147.129	0.694005	52.7444	0.320147
					F35	37.2482	0	14.8993	0.0996226
					F36	114.598	0	58.2701	0.284029
					F37	32.6392	0.694451	4.16671	0.13662
					F38	28.7859	0	3.97047	0.175271
					F39	151.313	0	21.1135	0.5444
					F4	87.0564	2.17641	21.7641	0.189958
					F40	38.618	1.10337	6.06855	0.198841
					F41	88.7527	3.58597	28.6878	0.381812
					F42	28.8942	0	5.46647	0.125508
					F43	9.79943	0	1.39992	0.0286215
					F44	121.362	0.948143	36.0294	0.118436
					F45	62.9185	0.886176	10.6341	0.296911
					F46	99.4581	0	17.325	0.398707
					F47	131.683	1.07937	33.4604	0.317529
					F48	130.021	0.742979	34.92	0.390451
					F49	132.084	0	45.8734	0.45972
					F5	140.001	0	30.3451	0.350793
					F50	104.446	1.77027	34.5203	0.331977
					F51	100.882	0.862241	9.48465	0.40041
					F52	169.951	1.49736	55.4024	0.229541
					F53	57.7139	1.7228	6.02981	0.137918
					F54	287.733	2.14726	98.7741	0.37232
					F55	345.849	2.88208	50.7246	0.422544
					F56	195.398	4.1427	69.7355	0.255978
					F57	59.4479	0.660533	30.3845	0.307674
					F58	14.6289	0	14.6289	0.0535859
					F59	55.155	0	17.2359	0.233368
					F6	587.722	1.22954	71.3136	0.491988
					F60	111.681	0	50.2563	0.250318
					F61	66.4366	0.949094	81.6221	0.310911
					F62	156.446	9.55398	24.4821	0.690949
					F63	56.0381	0.571818	4.00272	0.357699
					F64	619.744	4.83703	238.224	0.752401
					F65	885.516	20.6673	357.704	0.893612
					F66	111.736	0	47.4033	0.197883
					F67	85.4292	0	19.5267	0.172217
					F68	169.223	1.4341	48.0422	0.391931
					F69	36.642	0	6.34188	0.329426
					F7	172.148	0	70.8846	0.129095
					F70	206.169	4.04253	102.411	0.54431
					F71	175.651	0.929369	65.9852	0.410943
					F72	84.2541	0.79485	16.6918	0.467705
					F73	70.503	1.25898	22.6617	0.233873
					F74	352.856	2.91617	213.852	0.513262
					F75	111.169	1.61115	34.6396	0.331214
					F76	248.903	0	61.9759	0.469899
					F77	151.975	0	23.6565	0.567238
					F78	103.323	2.34825	17.2205	0.310711
					F79	278.998	3.94344	86.7556	0.558417
					F8	258.735	7.16497	92.3485	0.335469
					F80	174.413	0.764968	45.8981	0.178211
					F81	192.859	2.88928	40.4499	0.0686742
					F82	175.089	0.745059	88.6621	0.262242
					F83	316.424	3.11748	96.6417	0.25474
					F9	1310.59	8.82555	247.115	0.427368

## Sheet: Table S10
Table S10. Molecular marker data for QTL mapping in Figures 5, 6, 7, S8, and S10
A = Elbtalaue, B = Konstanz, X = Heterozygote, U = Undetermined
marker ID	bins_S000007F_206622	bins_S000007F_562563	bins_S000007F_1062422	bins_S000007F_1537897	bins_S000007F_1687514	bins_S000007F_1854045	bins_S000007F_2016064	bins_S000007F_2148893	bins_S000007F_2424975	bins_S000007F_2704396	bins_S000007F_2996297	bins_S000007F_3273778	bins_S000007F_3447976	bins_S000007F_3598884	bins_S000064F_343868	bins_S000064F_785356	bins_S000064F_933626	bins_S000060F_134375	bins_S000060F_593788	bins_S000140F_89528	bins_S000056F_226328	bins_S000001.2F_530983	bins_S000001.2F_1279325	bins_S000023F_1468051	bins_S000023F_986588	bins_S000023F_781110	bins_S000023F_521992	bins_S000023F_352989	bins_S000023F_170668	bins_S000025F_476638	bins_S000025F_1013520	bins_S000025F_1108489	bins_S000025F_1672687	bins_S000025F_1312487	bins_S000068F_404042	bins_S000068F_846900	bins_S000135F_63853	bins_S000049F_325720	bins_S000049F_901133	bins_S000118F_49252	bins_S000118F_169583	bins_S000118F_266513	bins_S000014F_163376	bins_S000014F_762743	bins_S000014F_1203954	bins_S000014F_1367122	bins_S000014F_1860347	bins_S000000F_4749853	bins_S000000F_4197202
Chromosome	1	1	1	1	1	1	1	1	1	1	1	1	1	1	1	1	1	1	1	1	1	1	1	1	1	1	1	1	1	1	1	1	1	1	1	1	1	1	1	1	1	1	1	1	1	1	1	1	1
Centimorgans	0	0.61	1.22	1.829	3.049	3.659	4.269	4.878	5.488	6.098	6.708	7.318	7.927	8.537	9.147	10.367	11.586	12.806	15.981	21.244	29.991	34.885	36.715	43.339	43.948	44.558	45.778	46.388	47.005	50.793	51.403	52.622	54.452	55.062	59.587	60.197	62.76	68.764	69.374	70.594	71.203	71.813	73.033	73.643	74.253	74.862	75.472	79.26	79.87
F2-1	U	U	U	U	U	U	U	U	U	U	U	U	U	U	U	U	U	U	U	U	U	X	X	U	U	U	U	U	U	U	U	U	U	U	U	U	U	U	U	U	U	U	U	U	U	U	U	U	U
F2-10	B	B	B	B	B	B	B	B	B	B	B	B	B	B	B	B	B	B	B	X	X	B	B	B	B	B	B	B	B	B	B	B	B	B	X	X	X	X	X	X	X	X	X	X	X	X	X	X	X
F2-11	X	X	X	X	X	X	X	X	X	X	X	X	X	X	X	X	X	X	X	X	X	X	X	X	X	X	X	X	X	X	X	X	X	X	X	X	X	A	A	A	A	A	A	A	A	A	A	A	A
F2-12	B	B	B	B	B	B	B	B	B	B	B	B	B	B	B	B	B	B	B	B	U	B	B	B	B	B	B	B	B	B	B	B	B	B	B	B	B	B	B	B	B	B	B	B	B	B	B	B	B
F2-13	B	B	B	B	B	B	B	B	B	B	B	B	B	B	B	B	B	B	B	X	U	B	B	X	X	X	X	X	X	A	A	A	A	A	A	A	A	A	A	A	A	A	A	A	A	A	A	A	A
F2-14	A	A	A	A	A	X	X	X	X	X	X	X	X	X	X	X	X	X	X	X	B	X	X	X	X	X	X	X	X	X	X	X	A	X	X	X	X	X	X	X	X	X	X	X	X	X	X	X	X
F2-15	X	X	X	X	X	X	X	X	X	X	X	X	X	X	X	B	B	B	B	B	B	B	B	B	B	B	B	B	B	B	B	B	B	B	B	B	B	B	B	B	B	B	B	B	B	B	B	B	B
F2-16	B	B	B	B	B	B	B	B	B	B	B	B	B	B	B	B	B	B	B	B	B	B	B	B	B	B	B	B	B	B	B	X	X	X	X	X	X	X	X	X	X	X	X	X	X	X	X	X	X
F2-17	B	B	B	B	B	B	B	B	B	B	B	B	B	B	B	B	B	B	B	B	X	B	B	B	B	B	B	B	B	X	X	X	X	X	X	X	X	X	X	X	X	X	X	X	X	X	X	X	X
F2-18	B	B	B	B	B	B	B	B	B	B	B	B	B	B	B	B	B	B	B	B	B	B	B	X	X	X	X	X	X	X	X	X	X	X	X	X	X	X	X	X	X	X	X	X	X	X	X	X	X
F2-19	A	A	A	A	A	A	A	A	A	A	A	A	A	A	A	A	X	X	X	X	X	X	X	X	X	X	X	X	X	X	X	X	X	X	X	X	X	X	X	X	X	X	X	X	X	X	X	X	X
F2-2	X	X	X	X	X	X	B	B	B	B	B	B	B	B	B	B	B	B	B	B	B	B	B	B	B	B	B	B	B	B	B	B	B	B	B	B	B	B	B	B	B	B	B	B	B	B	B	B	B
F2-20	A	A	A	A	A	A	A	A	A	A	A	A	A	A	A	A	A	A	A	A	A	A	X	X	X	B	B	B	B	B	B	B	B	B	B	B	B	B	B	B	B	B	B	B	B	B	B	B	B
F2-21	A	A	A	A	A	A	A	A	A	A	A	A	A	A	A	A	A	A	A	A	A	A	A	A	A	A	A	A	A	A	A	X	X	X	X	X	X	X	X	X	X	X	X	X	X	X	X	X	X
F2-22	X	X	X	X	X	X	X	X	X	X	X	X	X	X	X	X	X	X	X	X	U	A	A	X	X	X	X	X	X	X	X	X	X	X	X	X	U	X	X	X	X	X	X	X	X	X	X	B	B
F2-23	B	B	B	B	B	B	B	B	B	B	B	B	B	B	B	B	B	B	B	B	X	X	X	A	A	A	A	A	A	A	A	A	A	A	A	A	A	A	A	A	A	A	A	A	A	X	X	B	B
F2-24	X	X	X	X	X	X	X	X	X	X	X	X	X	X	X	X	X	X	X	B	X	B	B	B	B	B	B	B	B	B	B	B	B	B	B	B	B	X	X	X	X	X	X	X	X	X	X	X	X
F2-25	B	B	B	B	B	B	B	B	B	B	B	B	B	B	B	B	B	B	B	B	B	B	B	B	B	B	X	X	X	X	X	X	X	X	X	X	X	X	X	X	X	X	X	X	X	X	X	X	X
F2-26	B	B	B	B	B	B	B	B	B	B	B	B	B	B	B	B	B	B	B	B	X	X	X	X	X	X	X	X	X	X	X	X	X	X	X	X	X	X	X	X	X	X	X	X	A	A	A	A	A
F2-27	X	X	X	X	X	X	X	X	X	X	X	X	X	X	X	X	X	X	X	X	X	X	X	X	X	X	X	X	X	X	X	X	X	X	X	X	X	X	X	X	X	X	X	X	X	X	X	X	X
F2-28	X	X	X	X	X	X	X	X	X	X	X	X	X	X	X	X	X	X	X	X	X	X	X	X	X	X	X	X	X	X	X	X	X	X	X	X	X	X	X	X	X	X	X	X	X	X	X	A	A
F2-29	X	X	X	X	X	X	X	X	A	A	A	A	A	A	A	A	A	A	A	A	A	A	A	A	A	A	A	A	A	A	A	A	A	A	A	A	A	A	A	A	A	A	A	A	A	A	A	A	A
F2-3	X	X	X	X	X	X	X	X	X	X	X	X	X	X	X	X	X	X	X	X	X	X	X	X	X	X	X	X	X	X	X	X	X	X	X	X	X	A	A	A	A	A	A	A	A	A	A	A	A
F2-30	B	B	B	B	B	B	B	B	B	B	B	B	X	X	X	X	X	X	X	X	X	X	X	X	X	X	X	X	X	X	X	X	X	X	X	X	X	X	X	X	X	X	X	X	X	X	X	X	X
F2-31	X	X	X	X	X	X	X	X	X	X	X	X	X	X	X	X	X	X	A	A	A	A	A	A	A	A	A	A	A	A	A	A	A	A	A	A	A	A	A	A	A	A	A	A	A	A	A	A	A
F2-32	X	X	X	X	X	X	X	X	X	X	X	X	X	X	X	X	X	X	X	X	X	X	X	B	B	B	B	B	B	B	B	B	B	B	B	B	B	B	B	B	B	B	B	B	B	B	B	B	B
F2-33	X	X	X	X	X	X	X	X	X	X	X	A	A	A	A	A	A	A	A	A	A	A	A	X	X	X	X	X	X	X	X	X	X	X	X	X	X	X	X	X	X	X	X	X	X	X	X	X	X
F2-34	A	A	A	A	A	A	A	A	A	A	A	A	A	A	A	A	A	A	A	A	A	A	X	X	X	X	X	X	X	X	X	X	X	X	X	X	X	X	X	X	X	X	X	X	X	X	X	X	X
F2-35	X	X	B	B	B	B	B	B	B	B	B	B	B	B	B	B	B	B	B	X	B	B	B	B	B	B	B	B	B	B	B	B	B	B	X	X	X	X	X	X	X	X	X	X	X	X	X	X	X
F2-36	X	X	X	X	X	X	X	X	X	X	X	X	X	X	X	X	X	X	X	B	B	B	B	B	B	B	B	B	B	B	B	B	B	B	B	B	B	B	B	B	B	B	B	B	B	B	B	B	B
F2-37	X	X	X	X	X	X	X	X	X	X	X	X	X	X	X	X	X	X	X	X	X	X	X	X	X	X	X	X	X	X	X	X	X	X	X	X	X	X	A	A	A	A	X	X	X	X	X	X	X
F2-38	B	X	X	X	X	X	X	X	X	X	X	X	X	X	X	X	X	X	X	X	X	X	X	X	X	X	X	X	X	X	X	X	X	X	X	X	X	X	X	X	X	X	X	X	X	X	X	X	X
F2-39	X	X	X	X	X	X	X	X	X	X	X	X	X	X	X	X	X	X	X	A	A	A	A	A	A	A	A	A	A	A	A	A	A	A	A	A	A	A	A	A	A	A	A	A	A	A	A	A	A
F2-4	X	X	X	X	X	X	X	X	X	X	X	X	X	X	X	X	X	X	X	X	X	X	X	X	X	X	X	X	X	X	X	X	X	X	X	X	X	X	X	A	A	A	A	A	A	A	A	A	A
F2-40	X	X	X	X	X	X	X	X	X	X	X	X	X	X	X	X	X	X	X	X	X	X	X	X	X	X	X	X	X	X	X	X	X	X	X	X	X	A	A	A	A	A	A	A	A	A	A	A	A
F2-41	X	X	X	X	X	X	X	X	X	A	A	A	A	A	A	A	A	A	A	A	A	A	A	A	A	A	A	A	A	A	A	A	A	A	A	A	A	A	A	A	A	A	A	A	A	A	X	X	X
F2-42	X	X	X	X	X	X	X	X	X	X	X	X	X	X	X	X	X	X	X	X	X	X	X	X	X	X	X	X	X	X	X	X	X	X	X	X	X	X	X	X	X	X	X	X	X	X	X	B	B
F2-43	X	X	X	X	X	X	X	X	X	X	X	X	X	X	X	X	X	X	X	X	X	X	X	X	X	X	X	X	X	X	X	X	X	X	X	X	X	X	X	X	X	X	X	X	X	X	X	X	X
F2-44	B	B	B	X	X	X	X	X	X	X	X	X	X	X	X	X	X	X	X	X	X	X	X	X	X	X	X	X	X	A	A	A	A	A	A	A	A	A	A	A	A	A	A	A	A	A	A	A	A
F2-45	A	A	A	A	A	A	A	A	A	A	A	A	A	A	A	A	A	A	A	X	X	X	X	X	X	X	X	X	X	X	X	X	X	X	X	X	X	X	X	X	X	X	X	X	X	X	X	X	X
F2-46	B	B	B	B	B	B	B	B	B	B	B	B	B	B	B	B	B	B	B	B	B	B	B	B	B	B	B	B	B	B	B	B	B	B	B	B	B	B	B	B	X	X	X	X	X	X	X	X	X
F2-47	X	X	X	X	X	X	X	X	X	X	X	X	X	X	X	X	X	X	X	X	X	X	X	X	X	X	X	X	X	X	X	X	X	X	X	X	X	A	A	A	A	A	A	A	A	A	A	A	A
F2-48	A	A	A	A	A	A	A	A	A	A	A	A	A	A	A	A	A	A	A	A	A	A	A	A	X	X	X	X	X	X	X	X	X	X	X	X	X	X	X	X	X	X	X	X	X	X	X	X	X
F2-49	X	X	X	X	X	X	X	X	X	X	X	X	X	X	X	X	X	X	B	B	B	B	B	B	B	B	B	B	B	X	X	X	X	X	X	X	X	X	X	X	X	X	X	X	X	X	X	X	X
F2-5	B	B	B	B	B	B	B	B	B	B	B	B	B	B	B	X	B	B	X	X	A	A	A	A	A	A	A	A	A	A	A	A	A	A	A	A	A	A	A	A	A	A	A	A	A	A	A	A	A
F2-50	X	X	X	X	X	X	X	X	X	X	X	X	X	X	X	X	X	X	X	X	X	X	X	X	X	X	X	A	B	B	B	B	B	B	B	B	B	B	B	B	B	B	B	B	B	B	B	B	B
F2-51	B	B	B	B	B	B	B	B	B	B	B	B	B	B	B	B	B	B	X	X	X	X	X	X	X	X	X	X	X	X	X	X	X	X	X	X	X	X	X	X	X	X	X	X	X	X	X	X	X
F2-52	X	X	X	X	X	X	X	X	X	X	X	X	X	B	B	B	B	B	B	B	B	B	B	B	B	B	B	B	B	B	B	B	B	B	B	B	B	B	B	B	B	B	B	B	B	B	B	B	B
F2-53	A	A	A	A	A	A	A	A	A	A	A	A	A	A	A	A	A	A	A	A	A	A	A	A	A	A	A	A	A	A	A	A	A	A	X	X	X	X	X	X	X	X	X	X	X	X	X	X	X
F2-54	A	A	A	A	A	A	A	A	A	A	A	A	A	A	A	A	A	A	A	A	A	A	A	A	A	A	A	A	A	A	A	A	A	A	A	A	A	A	A	A	A	A	A	A	A	A	A	A	A
F2-55	X	X	X	X	X	X	X	X	X	X	X	X	X	X	X	X	X	X	X	X	X	X	X	X	X	X	X	X	X	X	X	X	X	X	X	X	X	X	X	X	X	X	X	X	X	X	X	X	X
F2-56	X	X	X	X	X	X	X	X	X	X	X	X	X	X	X	X	X	X	X	X	X	X	X	X	X	X	X	X	X	X	X	X	X	X	X	X	X	X	X	X	X	X	X	X	X	X	X	X	X
F2-57	A	A	A	A	A	A	A	A	A	A	A	A	A	A	A	A	A	A	X	X	X	X	X	X	X	X	X	X	X	X	X	X	X	X	X	X	X	X	X	X	X	X	X	A	A	A	A	A	A
F2-58	X	X	X	X	X	X	X	X	X	X	X	X	X	X	X	X	X	X	X	X	X	X	X	X	X	X	X	X	X	X	B	B	B	B	B	B	X	B	B	B	B	B	B	B	B	B	B	B	B
F2-59	B	B	B	B	B	B	B	B	B	B	B	B	B	B	B	B	B	B	B	B	B	B	B	B	B	B	B	B	B	B	B	B	X	X	A	A	A	A	A	A	A	A	A	A	A	A	A	A	A
F2-6	X	X	X	X	X	X	X	X	X	X	X	X	X	X	X	X	X	X	X	X	X	X	X	X	X	X	X	X	X	X	X	X	X	X	X	X	X	X	X	X	X	X	X	X	X	X	X	X	X
F2-60	B	B	B	B	B	B	B	B	B	B	B	B	B	B	B	B	B	B	B	B	X	X	X	X	X	X	X	X	X	X	X	X	X	X	X	X	X	X	X	X	X	X	X	X	X	X	X	X	X
F2-61	X	X	X	X	X	X	X	X	X	X	X	X	X	X	X	X	X	B	B	B	B	B	B	B	B	B	B	B	B	B	B	B	B	B	B	B	B	B	B	B	B	B	B	B	B	B	B	B	B
F2-62	X	X	X	X	X	X	X	X	X	X	X	X	X	X	X	X	X	X	X	X	X	X	X	X	X	X	X	X	X	X	X	X	X	X	X	X	X	X	X	X	X	X	X	X	X	X	X	X	X
F2-63	X	X	X	X	X	X	X	X	X	X	X	X	X	X	X	X	X	X	X	X	X	X	X	X	X	X	A	A	A	A	A	A	A	A	A	A	A	A	A	A	A	A	A	A	A	A	A	A	A
F2-64	A	A	A	A	A	A	A	A	A	A	X	X	X	X	X	X	X	X	X	X	X	X	X	B	B	B	B	B	B	B	B	B	B	B	B	B	B	B	B	B	B	B	B	B	B	B	B	B	B
F2-65	B	B	B	B	B	B	B	B	B	B	B	B	B	B	B	B	B	B	B	B	B	B	B	B	B	B	B	B	B	B	B	B	X	X	A	A	A	A	A	A	A	A	A	A	A	A	A	A	A
F2-66	X	X	X	X	X	X	X	X	X	X	X	X	X	X	X	X	X	X	X	X	U	X	X	X	X	X	X	X	X	X	X	X	X	X	X	X	X	X	X	X	X	X	X	X	X	X	X	X	X
F2-67	X	X	X	X	B	B	B	B	B	B	B	B	B	B	B	B	B	B	B	B	X	B	B	B	B	B	B	B	B	B	B	B	B	B	B	B	B	B	B	B	B	X	X	X	X	X	X	X	X
F2-68	X	X	X	X	A	A	A	A	A	A	A	A	A	A	A	A	A	A	A	A	A	A	A	A	A	A	A	A	A	A	A	A	A	A	A	A	A	A	A	A	A	A	A	A	A	A	A	A	A
F2-69	X	X	X	X	X	X	X	X	X	X	X	X	X	X	X	X	X	B	B	B	X	B	B	B	B	B	B	B	B	B	B	B	B	B	B	B	B	B	B	B	B	B	B	B	B	B	B	B	X
F2-7	B	B	B	B	B	B	B	B	B	B	B	B	B	B	X	X	X	X	X	U	U	X	X	X	X	X	X	X	X	X	X	X	X	X	X	X	U	U	U	X	X	X	B	B	B	B	B	B	B
F2-70	X	X	X	X	X	X	X	X	X	X	X	X	X	X	X	X	X	X	X	X	U	X	X	X	X	X	X	X	X	X	X	X	X	X	B	B	B	X	X	X	X	X	X	X	X	X	X	X	X
F2-71	X	X	X	X	X	X	X	X	X	X	X	X	X	X	X	X	X	X	X	X	X	X	X	X	X	X	X	X	X	X	X	X	X	X	X	X	X	A	A	A	A	A	A	A	A	A	A	A	A
F2-72	X	X	X	X	X	X	X	X	X	X	X	X	X	X	X	X	X	X	X	X	X	X	X	X	X	X	X	X	X	X	X	X	X	X	X	X	A	A	A	A	A	A	A	A	A	A	A	A	A
F2-73	X	X	X	X	X	X	X	X	X	X	X	X	X	X	X	X	X	X	X	X	X	X	X	X	X	X	X	X	X	A	A	A	A	A	A	A	A	A	A	A	A	A	A	A	A	A	A	A	A
F2-74	X	X	X	X	X	X	X	X	X	X	X	X	X	X	X	X	X	X	X	X	X	X	X	X	X	X	X	X	X	X	X	X	X	X	X	X	X	X	X	X	X	X	X	X	X	X	X	X	X
F2-75	X	X	X	X	X	X	X	A	A	A	A	A	A	A	A	A	A	A	A	A	A	A	A	A	A	A	A	A	A	A	A	A	A	A	A	A	X	A	A	A	A	A	A	A	A	A	A	X	X
F2-76	B	B	B	B	B	B	B	B	B	B	B	B	B	B	B	B	B	B	B	B	B	B	B	X	X	X	X	X	X	X	X	X	X	X	X	X	X	X	X	X	X	X	X	X	X	X	X	X	X
F2-77	A	A	A	A	A	A	A	A	A	A	A	A	A	A	A	A	A	A	A	A	X	X	X	X	X	X	X	X	X	X	X	X	X	X	X	X	X	X	X	X	X	X	X	X	X	X	X	B	B
F2-78	B	B	B	B	B	B	B	B	B	B	B	B	B	B	B	B	B	B	B	B	X	B	B	B	B	B	B	B	B	B	B	B	B	B	B	B	B	B	B	X	X	X	X	X	X	X	X	X	X
F2-79	X	X	X	X	X	X	X	X	X	X	X	X	X	X	X	X	X	X	X	X	X	X	X	X	X	X	X	X	X	A	A	A	A	A	A	A	A	A	A	A	A	A	A	A	A	A	A	A	A
F2-8	X	X	X	X	X	X	X	X	X	X	X	X	X	X	X	X	X	X	X	X	X	X	X	X	X	X	X	X	X	X	X	X	X	X	X	X	X	X	X	X	X	X	X	X	X	X	X	X	X
F2-80	A	A	A	A	A	A	A	A	A	A	A	A	A	A	A	A	A	A	A	A	A	A	X	X	X	X	X	X	X	X	X	X	X	X	X	X	X	X	X	X	X	X	X	X	X	X	X	X	X
F2-81	X	X	X	X	X	X	X	X	X	X	X	X	X	X	X	X	X	X	X	X	X	X	X	X	X	X	X	X	X	X	X	X	X	X	A	A	A	A	A	A	A	A	A	A	A	A	A	A	A
F2-82	X	X	X	X	X	X	X	X	X	X	X	X	X	X	X	X	X	X	X	X	X	X	X	X	X	X	X	X	X	X	X	X	X	X	X	B	X	X	X	X	X	X	X	X	X	X	X	X	X
F2-83	A	A	A	A	A	A	A	A	A	A	A	A	A	A	A	A	A	A	A	X	X	X	X	B	B	B	B	B	B	B	B	B	B	B	B	B	B	B	B	B	B	B	B	B	B	B	B	B	B
F2-9	B	B	B	B	B	B	B	B	B	B	B	B	B	B	B	B	B	B	B	B	B	B	B	X	X	X	X	X	X	X	X	X	X	X	X	X	X	X	X	X	X	X	X	X	X	X	X	X	X
[truncated: 440 more columns]

[truncated: 1 more sheets: Table S11]
